# Supplementary material
Source: PubMed Central journal article supplement (PMC5566512)
Supplement: 10.1074_M117.788315_jbc.M117.788315-1.pdf [file 10.1074_M117.788315_jbc.M117.788315-1.pdf]

## Supplementary Figures and Tables

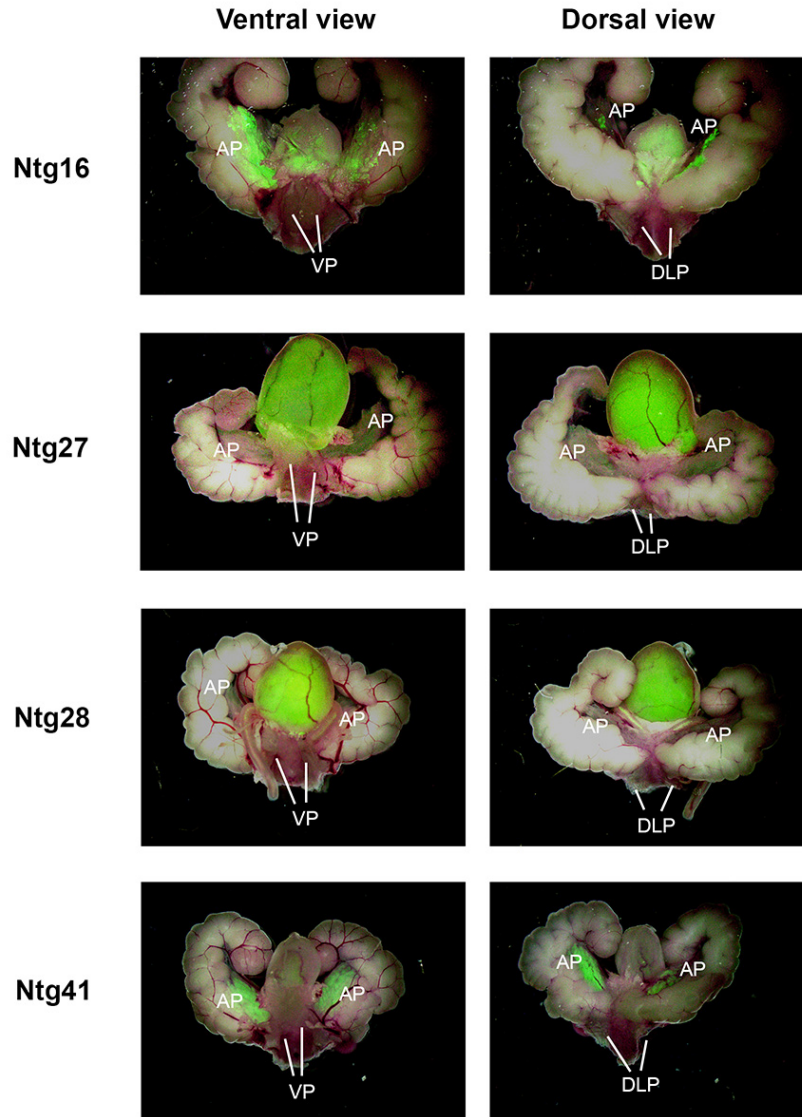

**Figure S1. Characterization of other *Nkx3.1(11)-d2EGFP* mouse lines.**

White field and GFP channel overlay images of dissected urogenital tissues showing various degrees of GFP expression in prostate lobes for the other four weaker *Nkx3.1(11)-d2EGFP* transgenic lines. The green signal in bladders was due to autofluorescence of urine.

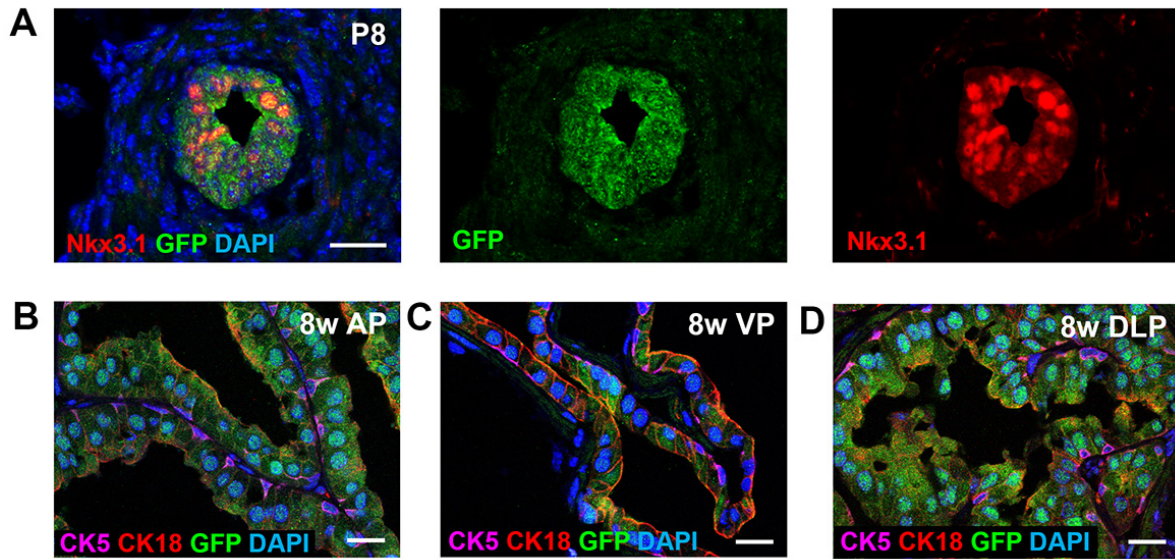

**Figure S2. Characterization of *Nkx3.1(11)-d2EGFP* in neonatal prostate and different adult prostate lobes.**

(A) IF image showing GFP reporter and Nkx3.1 co-localization in the prostate epithelium of mice at stage P8. (B-D) Representative IF images showing GFP reporter expression present in luminal cells of adult prostate at 8 weeks of age, with the following order of penetration in different lobes: AP>DLP>VP. Scale bars correspond to 20 microns.

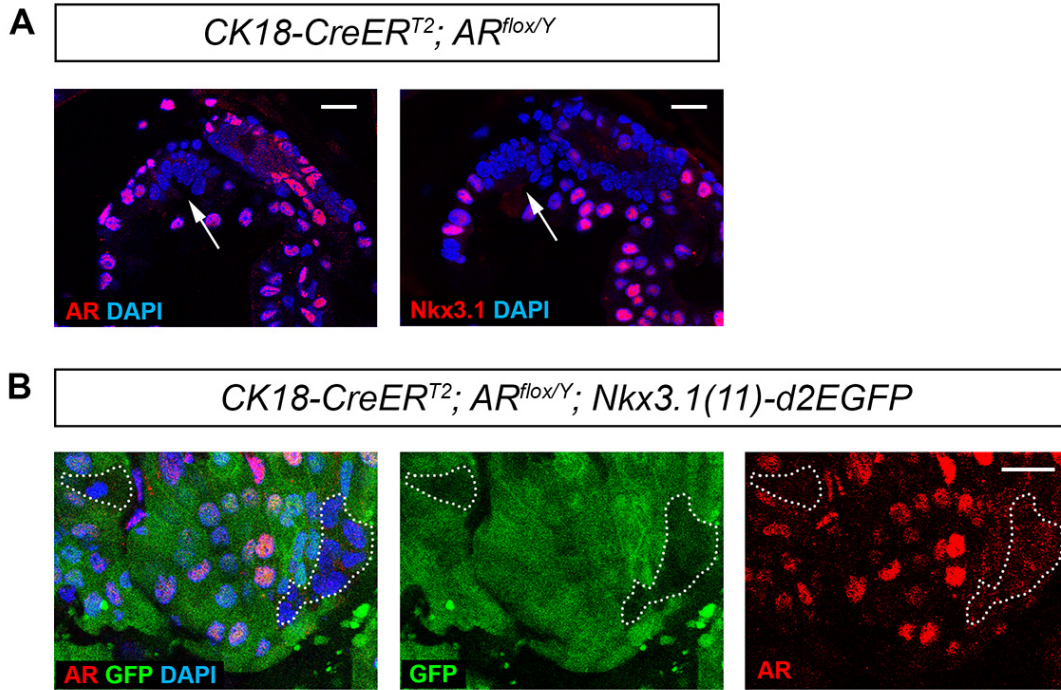

**Figure S3. AR activates *Nkx3.1* transcription through the 11-kb in luminal cells.**

(A) IF staining of adjacent sections of tamoxifen-induced *CK18-CreER<sup>T2</sup>; AR<sup>lox/Y</sup>* mice showing the absence of *Nkx3.1* signal in AR-deleted prostate luminal cells (arrow). (B) GFP reporter signal was strongly reduced in *AR*-null luminal cells in the DLP of tamoxifen-induced *CK18-CreER<sup>T2</sup>; AR<sup>lox/Y</sup>; Nkx3.1(11)-d2EGFP* mice. Scale bars correspond to 20 microns.

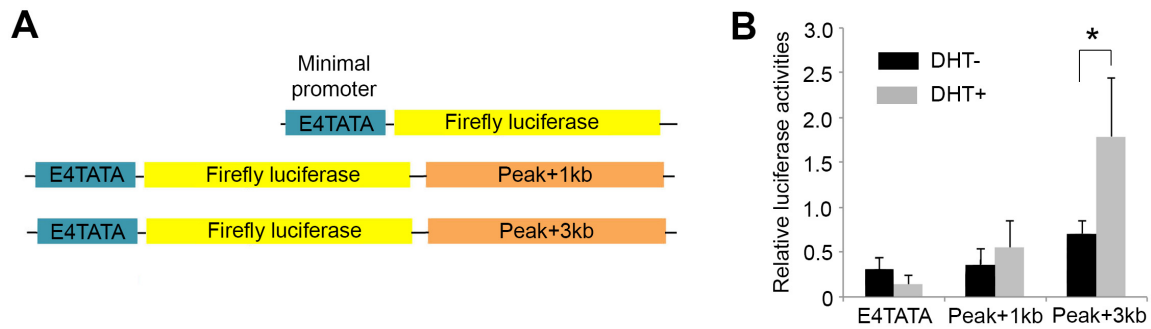

**Figure S4. Luciferase assays to test candidate enhancers.**

(A) Constructs for transient transfection and luciferase assays with the candidate enhancers positioned downstream of the luciferase sequence. (B) Luciferase reporter assays comparing the construct with only the minimal promoter to those containing “Peak+1kb” and “Peak+3kb” sequences downstream of the luciferase sequence showing that the “Peak+3kb” region is androgen responsive. Error bars correspond to one s.d. \*  $p < 0.05$  by student’s t test.

*CK18-CreER<sup>T2</sup>; Pten<sup>flx/flx</sup>; Nkx3.1(11)-d2EGFP*

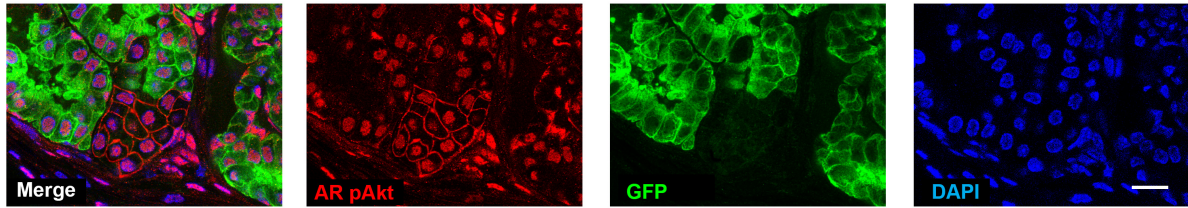

**Figure S5. Absence of GFP reporter signal in *Pten*-null luminal cells.**

Triple IF staining showing that *Pten*-null luminal cells, which were identified by pAkt signal (membrane red), still expressed nuclear AR (nuclear red), but lost the GFP reporter expression. Scale bar corresponds to 20 microns.

**Table S1. Summary of GFP expression intensity in five *Nkx3.1(11)-d2EGFP* transgenic lines.**

| Transgenic mouse lines | GFP expression in embryos | GFP expression in adult prostate |          |        |
|------------------------|---------------------------|----------------------------------|----------|--------|
|                        |                           | AP                               | VP       | DLP    |
| <i>Ntg16</i>           | negative                  | strong                           | weak     | weak   |
| <i>Ntg18</i>           | negative                  | strong                           | strong   | strong |
| <i>Ntg27</i>           | negative                  | moderate                         | weak     | weak   |
| <i>Ntg28</i>           | negative                  | weak                             | weak     | weak   |
| <i>Ntg41</i>           | negative                  | strong                           | moderate | strong |

**Table S2. Primers for mouse genotyping.**

| Allele                    |                   | Primer sequence               |
|---------------------------|-------------------|-------------------------------|
| <i>CreER<sup>T2</sup></i> | forward           | 5'-CAGATGGCGCGGCAACACC-3'     |
|                           | reverse           | 5'-GCGCGGTCTGGCAGTAAAAAC-3'   |
| <i>AR<sup>lox</sup></i>   | forward           | 5'-GTTGATACCTTAACCTCTGC-3'    |
|                           | reverse           | 5'-CTTCAGCGGCTCTTTTGAAG-3'    |
| <i>Pten<sup>lox</sup></i> | forward           | 5'-ACTCAAGGCAGGGATGAGC-3'     |
|                           | reverse           | 5'-GTCATCTTCACTTAGCCATTGG-3'  |
| <i>R26R-YFP</i>           | wild-type forward | 5'-GGAGCGGGAGAAATGGATATG-3'   |
|                           | mutated forward   | 5'-GCGAAGAGTTTGTCTCAACC-3'    |
|                           | reverse           | 5'-AAAGTCGCTCTGAGTTGTTAT-3'   |
| <i>Nkx3.1</i>             | wild-type forward | 5'-CTCCGCTACCCTAAGCATCC-3'    |
|                           | wild-type reverse | 5'-GACACTGTCATATTACTTGGACC-3' |

**Table S3. Antibodies used for immunofluorescence.**

| <b>Antigen</b> | <b>Supplier</b>                      | <b>Ig type</b> | <b>Dilution</b> |
|----------------|--------------------------------------|----------------|-----------------|
| AR             | Sigma #A9853                         | rabbit IgG     | 1:400           |
| CK5            | Covance #PRB-160P                    | rabbit IgG     | 1:500           |
| CK18           | Abcam #ab668                         | mouse IgG1     | 1:100           |
| Nkx3.1         | Kim et al. (2002) PNAS 99: 2884-2889 | rabbit IgG     | 1:2000          |
| Phospho-Akt    | Cell Signaling #3787                 | rabbit IgG     | 1:50            |
| GFP            | Abcam #13970                         | chick IgY      | 1:2000          |
| YFP            | Abcam #13970                         | chick IgY      | 1:2000          |



**Table S4. List of primer sequences for qRT-PCR**

| Genes  | Forward (5' to 3')    | Reverse (5' to 3')   |
|--------|-----------------------|----------------------|
| Fkbp5  | GGGATGTTGTCAGATGGAAAG | TGTCCCAGGCTTTGATAACC |
| Crabp1 | CGCTACAGCCAACACCACT   | TCAGCATGGCGTTCACAC   |
| Pgap2  | TCCACTTGTCGCCTTCTTCT  | CACTGATGGCAGGTAATTGG |
| Msemb  | TGGTGATAGCATCCAAAGCA  | AGCATCCATGCAGTCATCAG |
| Pbsn   | ACACGAGTGGCTGGAGTTTT  | TCCTCAATGCCCATTTCTTC |
| Mme    | CGAGACCAGTTCCCGATACA  | TTTTTGCTTTCTGCACTGCT |
| Actb   | CCAACCGTGAAAAGATGACC  | CCATCACAATGCCTGTGGTA |

**Table S5. List of primer sequences for qChIP**

| Location | Forward (5' to 3')    | Reverse (5' to 3')     |
|----------|-----------------------|------------------------|
| -6.5 kb  | ACTGGTGGCCAAAGTTCTGA  | TGGAAGTAGGGAAACTGAGGTC |
| -5.5 kb  | GCCACCCAGTCAGAGGATAG  | ATACAATAGTGCCCCGGTGA   |
| -4.5 kb  | CCAAAGAGCAAAGGGACAAG  | GTCAGGCCCTTGACTTTCAC   |
| -3.5 kb  | GCAGTGCGAACACTCTTGAC  | GAAGGAGGGGAGGCTAACAG   |
| -2.5 kb  | ATGGCCAGGGCTAATAAGGT  | AGCCGCTCTTCTGTGTGACT   |
| -1.3 kb  | AGTTTCCCTCCGAAGTTGCT  | GCTCTGCAGGGAACCTTGT    |
| -0.2 kb  | GAGAGGGAAACCAGGAAAGG  | GCTCCAGGTGACCCTCAAG    |
| +1 kb    | ACACACATCCAGGATCCACA  | ACATTCAGGTCTTAGCGGTTT  |
| +2 kb    | ATGGCCCCTTAGATGAGGAT  | AAGGGCAGAGAGAAACTCTGG  |
| +3 kb    | GGGGTGCTTGTTTTTCATGT  | CTCCTTGCTGGTTAGCTTGG   |
| +4 kb    | TGCGTGTGGTTTTTCAGATTC | AGTGTCTGTGGGAACATGG    |
| +5 kb    | GTGCCTACTTCAGGCAATCC  | CATGCTTCTTGCCTGCTACA   |
| +6 kb    | TGTGCAAGAGAAAGGGCATA  | AAGTCTGCAGAGGAGCCAAA   |
| +7 kb    | CCAAGAGAGTGGGTTTTCCA  | TCATTGCATGGCAAGAACAT   |
| +8 kb    | TATGCCCTGCAGCCATAAG   | TAGCTTTGGGCTAGGGTTCC   |
| +9.5 kb  | TCTGAGGGAAGGTGTCCTTG  | CCACCCTACTTCTCTGGGATG  |
